# Supplementary material
Source: publisher figshare collection journal article supplement (https://acs.figshare.com/ndownloader/files/4419718)
Supplement: Supplementary file 1 [file 4419718]

## Supporting Information

### Fabrication and Conductive Properties of Multilayered Ultrathin Films Designed by Layer-by-Layer Assembly of Water-Soluble Fullerenes

*Kohji Masuda, Takefumi Abe, Hiroaki Benten, Hideo Ohkita,\* Shinzaburo Ito*

Department of Polymer Chemistry, Graduate School of Engineering, Kyoto University,  
Katsura, Nishikyo, Kyoto 615-8510, Japan

**Surface roughness.** As summarized in Table S1, the surface roughness of (PDDA/FDCA)<sub>6</sub> and (FMAC/PSS)<sub>5</sub>/FMAC films shown in Figure 5 was typically ≤10 nm and independent of the scan area. As shown in Table S2, the same was true for the LbL films with different number of layers.

**Table S1.** Surface roughness measured for different scan sizes

| Film                          | Arithmetic mean roughness (Ra) / nm | Scan area / μm <sup>2</sup> | Film                     | Arithmetic mean roughness (Ra) / nm | Scan area / μm <sup>2</sup> |
|-------------------------------|-------------------------------------|-----------------------------|--------------------------|-------------------------------------|-----------------------------|
|                               | 6 ± 1                               | 4 × 4                       |                          | 8 ± 1                               | 4 × 4                       |
| (FMAC/PSS) <sub>5</sub> /FMAC | 7.8                                 | 6 × 6                       | (PDDA/FDCA) <sub>6</sub> | 9.5                                 | 10 × 10                     |
|                               | 8.5                                 | 10 × 10                     |                          |                                     |                             |

**Table S2.** Surface roughness measured for films with different number of layers

| Film                          | Arithmetic mean roughness (Ra) / nm | Scan area / μm <sup>2</sup> | Film                     | Arithmetic mean roughness (Ra) / nm | Scan area / μm <sup>2</sup> |
|-------------------------------|-------------------------------------|-----------------------------|--------------------------|-------------------------------------|-----------------------------|
| (FMAC/PSS) <sub>2</sub> /FMAC | 9.3                                 | 10 × 10                     | (PDDA/FDCA) <sub>4</sub> | 12.4                                | 10 × 10                     |
| (FMAC/PSS) <sub>5</sub> /FMAC | 8.5                                 |                             | (PDDA/FDCA) <sub>6</sub> | 9.5                                 |                             |
| (FMAC/PSS) <sub>8</sub> /FMAC | 10.5                                |                             | (PDDA/FDCA) <sub>8</sub> | 8.5                                 |                             |
